# Supplementary material for: Prediction of vascular access stenosis: Blood temperature monitoring with the Twister versus static intra-access pressure ratio
Source: PLoS One. 2018 Oct 29;13(10):e0204630. doi: 10.1371/journal.pone.0204630 (PMC6205593; doi:10.1371/journal.pone.0204630)
Supplement: S1 File — (XLSX) [file pone.0204630.s001.xlsx]

## Sheet: Sheet1
Sex	Age	HD duration	DM	AVF type	BFR	Qa BTM	Qa<300	Qa<400	Qa<500	Qa<600	Qa<700	Total stenosis	Inflow stenosis	Outflow stenosis	SIAPR	SIAPR(-)	SIAPR>0.5	Kt/V	Kt/V>1.6
F	54	278	0	Forearm	230	166	1	1	1	1	1	1	1	1	0.27	0.73	0	1.85	1
F	71	14	1	Upper	270	218	1	1	1	1	1	1	1	1	0.23	0.77	0	1.61	1
F	57	18	1	Forearm	230	241	1	1	1	1	1	1	1	0	0.19	0.81	0	2.4	1
F	45	11	1	Forearm	250	248	1	1	1	1	1	1	1	0	0.27	0.73	0	1.75	1
F	57	12	1	Forearm	200	252	1	1	1	1	1	1	1	0	0.22	0.78	0	2.38	1
M	60	23	1	Forearm	210	258	1	1	1	1	1	1	0	1	0.86	0.14	1	1.57	0
F	54	273	0	Forearm	250	267	1	1	1	1	1	1	1	1	0.34	0.66	0	1.8	1
M	61	5	1	Forearm	250	300	1	1	1	1	1	1	1	1	0.31	0.69	0	1.46	0
M	57	77	1	Forearm	260	306	0	1	1	1	1	0	0	0	0.17	0.83	0	1.34	0
F	63	24	1	Forearm	270	333	0	1	1	1	1	0	0	0	0.34	0.66	0	1.72	1
M	58	88	1	Forearm	270	338	0	1	1	1	1	1	1	0	0.27	0.73	0	1.57	0
F	57	143	1	Upper	250	338	0	1	1	1	1	1	1	0	0.62	0.38	1	1.66	1
F	63	30	1	Forearm	270	338	0	1	1	1	1	0	0	0	0.27	0.73	0	1.8	1
F	57	135	1	Upper	210	352	0	1	1	1	1	1	1	0	0.42	0.58	0	1.84	1
F	63	29	1	Forearm	260	353	0	1	1	1	1	0	0	0	0.25	0.75	0	1.8	1
F	63	38	1	Forearm	250	354	0	1	1	1	1	1	1	1	0.3	0.7	0	1.71	1
F	71	19	1	Upper	270	359	0	1	1	1	1	1	1	1	0.4	0.6	0	1.74	1
F	46	35	0	Forearm	270	369	0	1	1	1	1	1	1	0	0.17	0.83	0	2	1
F	57	139	1	Upper	250	372	0	1	1	1	1	1	1	0	0.67	0.33	1	1.91	1
M	67	7	1	Forearm	270	378	0	1	1	1	1	1	1	1	0.74	0.26	1	1.59	0
F	63	31	1	Forearm	280	389	0	1	1	1	1	0	0	0	0.27	0.73	0	1.8	1
F	63	36	1	Forearm	250	389	0	1	1	1	1	0	0	0	0.25	0.75	0	1.79	1
F	63	32	1	Forearm	250	396	0	1	1	1	1	0	0	0	0.22	0.78	0	1.82	1
M	48	59	1	Forearm	250	411	0	0	1	1	1	1	1	1	0.5	0.5	0	1.5	0
F	55	84	1	Forearm	280	413	0	0	1	1	1	1	1	1	0.61	0.39	1	1.5	0
M	64	22	1	Forearm	190	421	0	0	1	1	1	1	1	0	0.3	0.7	0	1.33	0
F	57	130	1	Upper	230	424	0	0	1	1	1	1	1	0	0.97	0.03	1	1.67	1
F	63	44	1	Forearm	260	436	0	0	1	1	1	0	0	0	0.19	0.81	0	2.03	1
M	48	52	1	Forearm	270	440	0	0	1	1	1	1	1	1	0.63	0.37	1	1.56	0
F	54	260	0	Forearm	270	444	0	0	1	1	1	0	0	0	0.41	0.59	0	1.82	1
F	63	43	1	Forearm	260	458	0	0	1	1	1	0	0	0	0.33	0.67	0	1.77	1
F	56	160	1	Forearm	270	466	0	0	1	1	1	0	0	0	0.39	0.61	0	2	1
F	63	35	1	Forearm	250	485	0	0	1	1	1	0	0	0	0.3	0.7	0	1.82	1
M	60	18	1	Forearm	250	486	0	0	1	1	1	1	0	1	0.76	0.24	1	1.52	0
F	67	29	1	Forearm	280	499	0	0	1	1	1	1	1	1	0.61	0.39	1	2.11	1
F	64	167	1	Forearm	270	502	0	0	0	1	1	0	0	0	0.23	0.77	0	2	1
F	63	40	1	Forearm	270	511	0	0	0	1	1	0	0	0	0.29	0.71	0	1.71	1
F	64	155	1	Forearm	250	511	0	0	0	1	1	0	0	0	0.31	0.69	0	1.64	1
M	80	40	1	Forearm	250	512	0	0	0	1	1	0	0	0	0.21	0.79	0	1.48	0
F	75	22	1	Forearm	260	518	0	0	0	1	1	0	0	0	0.18	0.82	0	1.77	1
M	57	57	1	Forearm	270	530	0	0	0	1	1	0	0	0	0.19	0.81	0	1.35	0
M	46	63	0	Forearm	240	532	0	0	0	1	1	0	0	0	0.22	0.78	0	1.51	0
M	46	76	0	Forearm	260	534	0	0	0	1	1	0	0	0	0.25	0.75	0	1.48	0
F	63	45	1	Forearm	270	537	0	0	0	1	1	0	0	0	0.31	0.69	0	2.03	1
F	75	15	1	Forearm	270	540	0	0	0	1	1	0	0	0	0.24	0.76	0	1.59	0
M	60	23	1	Forearm	260	546	0	0	0	1	1	0	0	0	0.86	0.14	1	1.57	0
F	63	34	1	Forearm	260	546	0	0	0	1	1	0	0	0	0.56	0.44	1	1.82	1
F	49	198	1	Forearm	260	547	0	0	0	1	1	0	0	0	0.37	0.63	0	1.79	1
F	56	153	1	Forearm	270	568	0	0	0	1	1	0	0	0	0.3	0.7	0	2	1
F	75	28	1	Forearm	250	569	0	0	0	1	1	0	0	0	0.18	0.82	0	1.64	1
F	75	34	1	Forearm	250	569	0	0	0	1	1	0	0	0	0.23	0.77	0	1.6	1
M	46	73	0	Forearm	270	570	0	0	0	1	1	1	1	0	0.28	0.72	0	1.44	0
M	57	70	1	Forearm	270	572	0	0	0	1	1	0	0	0	0.2	0.8	0	1.26	0
F	57	19	1	Forearm	230	582	0	0	0	1	1	1	1	0	0.29	0.71	0	2.4	1
F	46	32	0	Forearm	270	582	0	0	0	1	1	0	0	0	0.36	0.64	0	2.14	1
F	46	32	0	Forearm	270	582	0	0	0	1	1	0	0	0	0.36	0.64	0	2.14	1
F	49	194	1	Forearm	270	584	0	0	0	1	1	0	0	0	0.29	0.71	0	1.49	0
F	75	21	1	Forearm	250	584	0	0	0	1	1	0	0	0	0.51	0.49	1	1.77	1
F	57	142	1	Upper	250	584	0	0	0	1	1	0	0	0	0.62	0.38	1	1.66	1
M	60	17	1	Forearm	250	585	0	0	0	1	1	0	0	0	0.56	0.44	1	1.52	0
F	75	25	1	Forearm	280	588	0	0	0	1	1	0	0	0	0.25	0.75	0	1.67	1
F	71	7	1	Upper	250	589	0	0	0	1	1	0	0	0	0.22	0.78	0	2.34	1
M	62	2	1	Forearm	240	592	0	0	0	1	1	0	0	0	0.35	0.65	0	1.27	0
F	64	166	1	Forearm	270	598	0	0	0	1	1	0	0	0	0.45	0.55	0	1.65	1
M	68	164	1	Forearm	270	599	0	0	0	1	1	0	0	0	0.32	0.68	0	1.19	0
M	60	5	1	Forearm	230	603	0	0	0	0	1	0	0	0	0.68	0.32	1	4.36	1
F	80	329	0	Forearm	250	603	0	0	0	0	1	0	0	0	0.29	0.71	0	1.63	1
F	64	176	1	Forearm	270	604	0	0	0	0	1	0	0	0	0.17	0.83	0	1.84	1
F	57	134	1	Upper	260	608	0	0	0	0	1	0	0	0	0.6	0.4	1	1.87	1
M	59	10	0	Forearm	270	614	0	0	0	0	1	0	0	0	0.18	0.82	0	1.77	1
F	48	15	1	Forearm	250	616	0	0	0	0	1	0	0	0	0.16	0.84	0	1.79	1
F	46	25	0	Forearm	280	620	0	0	0	0	1	0	0	0	0.17	0.83	0	4.13	1
M	57	67	1	Forearm	270	630	0	0	0	0	1	0	0	0	0.19	0.81	0	1.37	0
M	57	75	1	Forearm	270	631	0	0	0	0	1	1	1	1	0.14	0.86	0	1.45	0
M	51	26	1	Forearm	250	632	0	0	0	0	1	0	0	0	0.31	0.69	0	1.64	1
F	47	83	0	Forearm	250	635	0	0	0	0	1	0	0	0	0.42	0.58	0	2.03	1
F	75	32	1	Forearm	280	637	0	0	0	0	1	0	0	0	0.18	0.82	0	1.66	1
M	60	16	1	Forearm	270	647	0	0	0	0	1	0	0	0	0.58	0.42	1	1.52	0
F	55	87	1	Forearm	270	647	0	0	0	0	1	0	0	0	0.76	0.24	1	2.04	1
F	57	24	1	Forearm	260	647	0	0	0	0	1	0	0	0	0.52	0.48	1	2.23	1
F	55	106	1	Forearm	260	647	0	0	0	0	1	0	0	0	0.35	0.65	0	1.88	1
F	80	310	0	Forearm	270	651	0	0	0	0	1	0	0	0	0.38	0.62	0	4.41	1
F	64	172	1	Forearm	280	657	0	0	0	0	1	0	0	0	0.22	0.78	0	1.94	1
F	80	320	0	Forearm	250	660	0	0	0	0	1	0	0	0	0.21	0.79	0	1.82	1
F	45	8	1	Forearm	270	666	0	0	0	0	1	0	0	0	0.21	0.79	0	1.78	1
F	46	33	0	Forearm	270	668	0	0	0	0	1	0	0	0	0.15	0.85	0	2	1
F	75	30	1	Forearm	270	668	0	0	0	0	1	0	0	0	0.25	0.75	0	1.66	1
M	48	63	1	Forearm	250	673	0	0	0	0	1	0	0	0	0.24	0.76	0	1.51	0
F	80	314	0	Forearm	270	680	0	0	0	0	1	0	0	0	0.22	0.78	0	1.96	1
F	46	29	0	Forearm	270	686	0	0	0	0	1	0	0	0	0.17	0.83	0	2.09	1
F	64	163	1	Forearm	270	690	0	0	0	0	1	0	0	0	0.35	0.65	0	1.88	1
F	73	30	1	Forearm	270	708	0	0	0	0	0	0	0	0	0.2	0.8	0	1.68	1
M	57	73	1	Forearm	260	709	0	0	0	0	0	0	0	0	0.15	0.85	0	1.26	0
F	68	27	1	Upper	270	713	0	0	0	0	0	0	0	0	0.39	0.61	0	1.63	1
F	48	13	1	Forearm	200	716	0	0	0	0	0	0	0	0	0.17	0.83	0	2	1
F	51	71	1	Forearm	270	722	0	0	0	0	0	0	0	0	0.18	0.82	0	1.6	1
M	64	106	1	Forearm	270	722	0	0	0	0	0	0	0	0	0.14	0.86	0	1.75	1
F	57	146	1	Upper	260	723	0	0	0	0	0	0	0	0	0.65	0.35	1	1.66	1
M	49	30	0	Forearm	250	725	0	0	0	0	0	0	0	0	0.24	0.76	0	1.32	0
F	56	164	1	Forearm	250	732	0	0	0	0	0	0	0	0	0.3	0.7	0	1.69	1
F	67	36	1	Forearm	270	732	0	0	0	0	0	0	0	0	0.58	0.42	1	2.09	1
F	56	173	1	Forearm	250	739	0	0	0	0	0	0	0	0	0.24	0.76	0	2.09	1
F	45	2	1	Forearm	270	745	0	0	0	0	0	0	0	0	0.24	0.76	0	1.33	0
F	80	317	0	Forearm	260	749	0	0	0	0	0	0	0	0	0.2	0.8	0	2.1	1
M	80	42	1	Forearm	260	749	0	0	0	0	0	0	0	0	0.31	0.69	0	1.35	0
F	63	124	0	Forearm	270	750	0	0	0	0	0	0	0	0	0.47	0.53	0	2.37	1
F	61	56	1	Forearm	250	758	0	0	0	0	0	0	0	0	0.29	0.71	0	1.62	1
F	64	45	1	Forearm	250	758	0	0	0	0	0	0	0	0	0.24	0.76	0	1.64	1
F	64	169	1	Forearm	270	758	0	0	0	0	0	0	0	0	0.15	0.85	0	2	1
F	64	52	1	Forearm	260	758	0	0	0	0	0	0	0	0	0.28	0.72	0	1.75	1
M	57	72	1	Forearm	270	764	0	0	0	0	0	0	0	0	0.29	0.71	0	1.26	0
M	64	102	1	Forearm	270	764	0	0	0	0	0	0	0	0	0.18	0.82	0	1.72	1
F	54	90	1	Forearm	280	765	0	0	0	0	0	0	0	0	0.09	0.91	0	1.57	0
M	52	70	0	Forearm	280	768	0	0	0	0	0	0	0	0	0.2	0.8	0	1.4	0
F	57	147	1	Upper	270	771	0	0	0	0	0	0	0	0	0.65	0.35	1	1.65	1
F	54	81	1	Forearm	260	773	0	0	0	0	0	0	0	0	0.36	0.64	0	1.46	0
M	68	158	1	Forearm	280	773	0	0	0	0	0	0	0	0	0.21	0.79	0	3.81	1
M	49	37	0	Forearm	250	778	0	0	0	0	0	0	0	0	0.17	0.83	0	1.29	0
M	80	38	1	Forearm	270	778	0	0	0	0	0	0	0	0	0.38	0.62	0	1.33	0
M	64	114	1	Forearm	290	780	0	0	0	0	0	0	0	0	0.52	0.48	1	1.83	1
M	57	148	0	Forearm	280	782	0	0	0	0	0	0	0	0	0.25	0.75	0	1.56	0
F	48	109	0	Forearm	290	786	0	0	0	0	0	0	0	0	0.24	0.76	0	1.85	1
F	69	221	0	Forearm	280	786	0	0	0	0	0	0	0	0	0.18	0.82	0	2.06	1
M	59	121	1	Forearm	280	787	0	0	0	0	0	0	0	0	0.21	0.79	0	1.43	0
F	57	144	1	Upper	260	789	0	0	0	0	0	0	0	0	0.65	0.35	1	1.66	1
F	55	101	1	Forearm	270	790	0	0	0	0	0	0	0	0	0.34	0.66	0	1.78	1
F	56	167	1	Forearm	270	798	0	0	0	0	0	0	0	0	0.21	0.79	0	1.69	1
F	56	159	1	Forearm	260	798	0	0	0	0	0	0	0	0	0.35	0.65	0	2	1
F	80	326	0	Forearm	260	798	0	0	0	0	0	0	0	0	0.82	0.18	1	1.69	1
M	71	29	0	Forearm	260	800	0	0	0	0	0	0	0	0	0.23	0.77	0	1.56	0
M	49	20	1	Forearm	300	807	0	0	0	0	0	0	0	0	0.33	0.67	0	1.2	0
M	60	14	1	Forearm	250	808	0	0	0	0	0	0	0	0	0.61	0.39	1	1.7	1
M	60	20	1	Forearm	250	808	0	0	0	0	0	0	0	0	0.91	0.09	1	1.42	0
M	49	24	0	Forearm	260	809	0	0	0	0	0	0	0	0	0.23	0.77	0	1.27	0
M	57	63	1	Forearm	270	810	0	0	0	0	0	0	0	0	0.2	0.8	0	1.27	0
M	59	50	1	Forearm	250	817	0	0	0	0	0	0	0	0	0.3	0.7	0	1.32	0
F	54	75	1	Forearm	270	819	0	0	0	0	0	0	0	0	0.29	0.71	0	1.53	0
M	51	22	1	Forearm	260	819	0	0	0	0	0	1	1	0	0.19	0.81	0	1.55	0
F	64	161	1	Forearm	270	819	0	0	0	0	0	0	0	0	0.67	0.33	1	1.88	1
M	77	19	0	Forearm	250	820	0	0	0	0	0	0	0	0	0.58	0.42	1	4.64	1
M	64	110	1	Forearm	290	821	0	0	0	0	0	0	0	0	0.12	0.88	0	1.63	1
F	57	16	1	Forearm	240	821	0	0	0	0	0	0	0	0	0.23	0.77	0	2.68	1
M	75	88	1	Forearm	240	828	0	0	0	0	0	0	0	0	0.17	0.83	0	1.66	1
F	51	24	1	Upper	260	829	0	0	0	0	0	0	0	0	0.62	0.38	1	2.05	1
F	55	95	1	Forearm	270	829	0	0	0	0	0	0	0	0	0.37	0.63	0	1.9	1
F	57	22	1	Forearm	270	829	0	0	0	0	0	0	0	0	0.2	0.8	0	2.3	1
F	69	218	0	Forearm	270	831	0	0	0	0	0	0	0	0	0.18	0.82	0	1.84	1
F	57	32	1	Forearm	250	841	0	0	0	0	0	0	0	0	0.12	0.88	0	2.53	1
M	83	58	1	Forearm	260	850	0	0	0	0	0	0	0	0	0.23	0.77	0	1.39	0
F	64	49	1	Forearm	270	851	0	0	0	0	0	0	0	0	0.24	0.76	0	1.71	1
M	75	96	1	Forearm	270	851	0	0	0	0	0	0	0	0	0.26	0.74	0	1.35	0
F	69	215	0	Forearm	270	861	0	0	0	0	0	0	0	0	0.15	0.85	0	1.95	1
M	59	21	0	Forearm	250	869	0	0	0	0	0	0	0	0	0.28	0.72	0	1.48	0
M	64	112	1	Forearm	280	871	0	0	0	0	0	0	0	0	0.2	0.8	0	1.63	1
M	57	77	1	Forearm	200	874	0	0	0	0	0	1	1	1	0.17	0.83	0	1.34	0
F	51	27	1	Upper	260	883	0	0	0	0	0	0	0	0	0.45	0.55	0	2.2	1
F	45	5	1	Forearm	250	884	0	0	0	0	0	0	0	0	0.33	0.67	0	3	1
M	49	17	1	Forearm	280	893	0	0	0	0	0	0	0	0	0.4	0.6	0	1.25	0
F	69	209	0	Forearm	270	894	0	0	0	0	0	0	0	0	0.17	0.83	0	2.08	1
M	57	61	1	Forearm	270	894	0	0	0	0	0	0	0	0	0.18	0.82	0	1.45	0
F	73	27	1	Forearm	280	895	0	0	0	0	0	0	0	0	0.2	0.8	0	1.63	1
F	73	36	1	Forearm	250	900	0	0	0	0	0	0	0	0	0.25	0.75	0	1.66	1
F	67	42	1	Forearm	270	900	0	0	0	0	0	0	0	0	0.71	0.29	1	2.09	1
M	52	60	0	Forearm	270	904	0	0	0	0	0	0	0	0	0.21	0.79	0	1.23	0
F	55	2	0	Forearm	250	906	0	0	0	0	0	0	0	0	0.62	0.38	1
F	64	39	1	Forearm	270	908	0	0	0	0	0	0	0	0	0.21	0.79	0	1.75	1
M	73	44	1	Upper	260	913	0	0	0	0	0	0	0	0	0.52	0.48	1	1.71	1
M	67	27	1	Forearm	270	917	0	0	0	0	0	0	0	0	0.25	0.75	0	1.67	1
F	69	212	0	Forearm	270	924	0	0	0	0	0	0	0	0	0.15	0.85	0	2.05	1
M	59	118	1	Forearm	290	925	0	0	0	0	0	0	0	0	0.17	0.83	0	1.57	0
M	64	109	1	Forearm	290	925	0	0	0	0	0	0	0	0	0.16	0.84	0	1.72	1
M	32	21	1	Forearm	260	926	0	0	0	0	0	0	0	0	0.29	0.71	0	1.15	0
F	57	138	1	Upper	260	926	0	0	0	0	0	0	0	0	0.53	0.47	1	1.91	1
M	57	76	1	Forearm	260	942	0	0	0	0	0	0	0	0	0.15	0.85	0	1.45	0
M	52	50	0	Forearm	280	950	0	0	0	0	0	0	0	0	0.16	0.84	0	1.26	0
F	57	140	1	Upper	250	950	0	0	0	0	0	0	0	0	0.48	0.52	0	1.91	1
F	51	60	1	Forearm	270	954	0	0	0	0	0	0	0	0	0.13	0.87	0	1.62	1
M	48	62	1	Forearm	270	954	0	0	0	0	0	0	0	0	0.5	0.5	0	1.43	0
F	67	35	1	Forearm	260	956	0	0	0	0	0	0	0	0	0.68	0.32	1	2.09	1
F	80	323	0	Forearm	260	956	0	0	0	0	0	0	0	0	0.23	0.77	0	1.89	1
F	51	18	1	Upper	270	962	0	0	0	0	0	0	0	0	0.51	0.49	1	1.94	1
M	80	28	1	Forearm	280	966	0	0	0	0	0	0	0	0	0.23	0.77	0	1.63	1
M	71	34	0	Forearm	250	966	0	0	0	0	0	0	0	0	0.23	0.77	0	1.45	0
F	51	21	1	Upper	280	966	0	0	0	0	0	0	0	0	0.37	0.63	0	1.54	0
F	57	137	1	Forearm	250	969	0	0	0	0	0	0	0	0	0.67	0.33	1	1.84	1
F	51	34	1	Upper	250	969	0	0	0	0	0	0	0	0	0.45	0.55	0	1.96	1
F	64	156	1	Forearm	270	972	0	0	0	0	0	0	0	0	0.17	0.83	0	1.64	1
F	39	72	0	Forearm	270	978	0	0	0	0	0	1	0	1	0.3	0.7	0	2.3	1
F	78	83	1	Forearm	270	978	0	0	0	0	0	0	0	0	0.24	0.76	0	1.38	0
M	60	12	1	Forearm	280	983	0	0	0	0	0	0	0	0	0.73	0.27	1	1.56	0
M	52	56	0	Forearm	280	990	0	0	0	0	0	0	0	0	0.19	0.81	0	1.26	0
M	46	70	0	Forearm	280	990	0	0	0	0	0	0	0	0	0.21	0.79	0	1.29	0
F	51	14	1	Upper	270	992	0	0	0	0	0	0	0	0	0.3	0.7	0	1.74	1
F	54	86	1	Forearm	260	994	0	0	0	0	0	0	0	0	0.27	0.73	0	1.54	0
F	57	25	1	Forearm	260	1005	0	0	0	0	0	0	0	0	0.45	0.55	0	2.23	1
F	57	74	1	Forearm	260	1008	0	0	0	0	0	0	0	0	0.33	0.67	0	1.22	0
M	83	67	1	Forearm	260	1008	0	0	0	0	0	0	0	0	0.13	0.87	0	1.36	0
F	57	29	1	Forearm	270	1018	0	0	0	0	0	0	0	0	0.26	0.74	0	2.53	1
M	32	24	1	Forearm	280	1021	0	0	0	0	0	0	0	0	0.39	0.61	0	1.32	0
M	49	10	1	Forearm	270	1021	0	0	0	0	0	0	0	0	0.47	0.53	0	1.21	0
F	71	23	1	Upper	270	1021	0	0	0	0	0	0	0	0	0.5	0.5	0	1.63	1
F	58	116	0	Forearm	240	1022	0	0	0	0	0	0	0	0	0.42	0.58	0	1.66	1
M	55	7	1	Forearm	270	1026	0	0	0	0	0	0	0	0	0.6	0.4	1	1.36	0
F	51	66	1	Forearm	260	1030	0	0	0	0	0	0	0	0	0.26	0.74	0	1.5	0
M	67	7	0	Forearm	260	1032	0	0	0	0	0	0	0	0	0.26	0.74	0	1.36	0
M	59	114	1	Forearm	280	1039	0	0	0	0	0	0	0	0	0.26	0.74	0	1.52	0
M	52	66	0	Forearm	280	1039	0	0	0	0	0	0	0	0	0.19	0.81	0	1.38	0
M	75	99	1	Forearm	250	1039	0	0	0	0	0	0	0	0	0.22	0.78	0	1.51	0
F	73	21	1	Forearm	270	1042	0	0	0	0	0	0	0	0	0.28	0.72	0	1.62	1
M	80	118	0	Forearm	270	1043	0	0	0	0	0	0	0	0	0.25	0.75	0	1.28	0
F	78	79	1	Forearm	270	1043	0	0	0	0	0	0	0	0	0.28	0.72	0	1.27	0
F	57	59	1	Forearm	270	1046	0	0	0	0	0	0	0	0	0.25	0.75	0	1.26	0
M	52	63	0	Forearm	290	1050	0	0	0	0	0	0	0	0	0.19	0.81	0	1.29	0
F	47	86	0	Forearm	260	1055	0	0	0	0	0	0	0	0	0.28	0.72	0	1.85	1
M	59	22	0	Forearm	260	1055	0	0	0	0	0	0	0	0	0.33	0.67	0	1.48	0
F	61	60	1	Forearm	280	1055	0	0	0	0	0	0	0	0	0.24	0.76	0	1.55	0
F	47	78	0	Forearm	280	1055	0	0	0	0	0	0	0	0	0.33	0.67	0	1.98	1
F	73	33	1	Forearm	260	1056	0	0	0	0	0	0	0	0	0.16	0.84	0	1.61	1
M	75	83	1	Forearm	280	1059	0	0	0	0	0	0	0	0	0.3	0.7	0	1.43	0
F	57	20	1	Forearm	270	1069	0	0	0	0	0	0	0	0	0.29	0.71	0	2.3	1
M	64	113	1	Forearm	290	1070	0	0	0	0	0	0	0	0	0.1	0.9	0	1.63	1
F	48	99	0	Forearm	270	1072	0	0	0	0	0	0	0	0	0.14	0.86	0	1.79	1
F	67	80	0	Forearm	260	1081	0	0	0	0	0	0	0	0	0.45	0.55	0	3.28	1
F	67	45	1	Forearm	260	1081	0	0	0	0	0	0	0	0	0.84	0.16	1	2.23	1
M	64	19	1	Forearm	260	1081	0	0	0	0	0	0	0	0	0.29	0.71	0	1.5	0
M	75	153	1	Forearm	280	1082	0	0	0	0	0	0	0	0	0.18	0.82	0	1.42	0
M	69	87	1	Forearm	280	1082	0	0	0	0	0	0	0	0	0.2	0.8	0	1.4	0
M	32	31	1	Forearm	280	1085	0	0	0	0	0	0	0	0	0.39	0.61	0	1.58	0
M	71	23	0	Forearm	250	1090	0	0	0	0	0	0	0	0	0.31	0.69	0	1.36	0
M	46	97	1	Forearm	270	1096	0	0	0	0	0	0	0	0	0.41	0.59	0	1.03	0
F	69	206	0	Forearm	270	1096	0	0	0	0	0	0	0	0	0.2	0.8	0	1.96	1
M	69	84	1	Forearm	250	1098	0	0	0	0	0	0	0	0	0.23	0.77	0	1.35	0
F	63	130	0	Forearm	260	1107	0	0	0	0	0	0	0	0	0.27	0.73	0	2.11	1
M	32	27	1	Forearm	260	1107	0	0	0	0	0	0	0	0	0.33	0.67	0	1.28	0
M	46	87	1	Forearm	280	1111	0	0	0	0	0	0	0	0	0.26	0.74	0	1.08	0
M	61	177	0	Forearm	280	1115	0	0	0	0	0	0	0	0	0.3	0.7	0	1.47	0
F	56	120	1	Forearm	270	1123	0	0	0	0	0	0	0	0	0.23	0.77	0	2.1	1
F	62	142	1	Forearm	270	1123	0	0	0	0	0	0	0	0	0.18	0.82	0	1.69	1
M	77	26	0	Forearm	270	1124	0	0	0	0	0	0	0	0	0.32	0.68	0	1.53	0
F	57	127	1	Upper	250	1134	0	0	0	0	0	0	0	0	0.71	0.29	1	1.91	1
M	67	35	1	Forearm	260	1136	0	0	0	0	0	0	0	0	0.19	0.81	0	1.63	1
F	61	63	1	Forearm	280	1136	0	0	0	0	0	0	0	0	0.32	0.68	0	1.71	1
M	72	2	1	Forearm	260	1136	0	0	0	0	0	0	0	0	0.27	0.73	0	1.49	0
M	59	9	0	Forearm	250	1146	0	0	0	0	0	0	0	0	0.19	0.81	0	1.77	1
M	67	10	0	Forearm	270	1150	0	0	0	0	0	0	0	0	0.25	0.75	0	1.38	0
F	57	30	1	Forearm	270	1152	0	0	0	0	0	0	0	0	0.22	0.78	0	2.53	1
F	61	70	1	Forearm	270	1152	0	0	0	0	0	0	0	0	0.28	0.72	0	1.87	1
F	69	202	0	Forearm	270	1152	0	0	0	0	0	0	0	0	0.16	0.84	0	1.99	1
M	67	15	1	Forearm	270	1152	0	0	0	0	0	0	0	0	0.23	0.77	0	1.69	1
F	47	90	0	Forearm	270	1156	0	0	0	0	0	0	0	0	0.21	0.79	0	1.95	1
M	80	34	1	Forearm	270	1156	0	0	0	0	0	0	0	0	0.32	0.68	0	1.51	0
M	46	67	0	Forearm	270	1177	0	0	0	0	0	0	0	0	0.17	0.83	0	1.55	0
F	57	55	1	Forearm	260	1179	0	0	0	0	0	0	0	0	0.32	0.68	0	1.36	0
F	67	67	0	Forearm	270	1180	0	0	0	0	0	0	0	0	0.29	0.71	0	1.98	1
F	55	91	1	Forearm	270	1180	0	0	0	0	0	0	0	0	0.28	0.72	0	1.89	1
M	49	43	0	Forearm	270	1180	0	0	0	0	0	0	0	0	0.37	0.63	0	2.3	1
F	62	66	0	Forearm	270	1180	0	0	0	0	0	0	0	0	0.72	0.28	1	2	1
F	73	17	1	Forearm	270	1185	0	0	0	0	0	0	0	0	0.23	0.77	0	1.44	0
M	69	73	1	Forearm	260	1199	0	0	0	0	0	0	0	0	0.24	0.76	0	1.45	0
M	77	36	0	Forearm	260	1199	0	0	0	0	0	0	0	0	0.28	0.72	0	1.42	0
M	69	81	1	Forearm	260	1199	0	0	0	0	0	0	0	0	0.35	0.65	0	1.51	0
M	67	22	1	Forearm	260	1199	0	0	0	0	0	0	0	0	0.37	0.63	0	1.76	1
F	67	83	0	Forearm	260	1199	0	0	0	0	0	1	0	1	0.46	0.54	0	1.88	1
M	32	10	1	Forearm	250	1200	0	0	0	0	0	0	0	0	0.39	0.61	0	1.06	0
F	55	198	0	Forearm	270	1208	0	0	0	0	0	0	0	0	0.34	0.66	0	2.56	1
M	32	16	1	Forearm	270	1208	0	0	0	0	0	0	0	0	0.52	0.48	1	1.12	0
F	57	27	1	Forearm	260	1209	0	0	0	0	0	0	0	0	0.33	0.67	0	2.02	1
F	56	161	1	Forearm	270	1215	0	0	0	0	0	1	1	1	0.34	0.66	0	2	1
F	62	72	0	Forearm	270	1215	0	0	0	0	0	0	0	0	0.62	0.38	1	1.98	1
M	83	47	1	Forearm	270	1215	0	0	0	0	0	0	0	0	0.22	0.78	0	1.77	1
M	58	51	1	Upper	280	1220	0	0	0	0	0	0	0	0	0.6	0.4	1	3.61	1
F	68	21	1	Upper	270	1225	0	0	0	0	0	0	0	0	0.43	0.57	0	1.95	1
F	57	65	1	Forearm	280	1229	0	0	0	0	0	0	0	0	0.38	0.62	0	1.21	0
M	80	99	0	Forearm	270	1237	0	0	0	0	0	0	0	0	0.26	0.74	0	1.16	0
M	58	56	1	Upper	270	1237	0	0	0	0	0	0	0	0	0.62	0.38	1	1.35	0
M	77	29	0	Forearm	280	1238	0	0	0	0	0	0	0	0	0.35	0.65	0	1.35	0
M	75	147	1	Forearm	270	1245	0	0	0	0	0	0	0	0	0.21	0.79	0	1.5	0
F	39	78	0	Forearm	250	1251	0	0	0	0	0	0	0	0	0.2	0.8	0	2.1	1
M	49	34	0	Forearm	250	1251	0	0	0	0	0	0	0	0	0.29	0.71	0	1.3	0
F	48	112	0	Forearm	260	1257	0	0	0	0	0	0	0	0	0.2	0.8	0	1.85	1
F	57	172	0	Forearm	260	1257	0	0	0	0	0	0	0	0	0.42	0.58	0	2.08	1
M	46	101	1	Forearm	260	1257	0	0	0	0	0	0	0	0	0.56	0.44	1	2.18	1
F	54	22	0	Upper	270	1266	0	0	0	0	0	0	0	0	0.83	0.17	1	1.69	1
M	63	56	1	Forearm	260	1270	0	0	0	0	0	0	0	0	0.12	0.88	0	1.32	0
F	50	61	0	Forearm	260	1270	0	0	0	0	0	0	0	0	0.36	0.64	0	1.87	1
F	48	106	0	Forearm	270	1275	0	0	0	0	0	0	0	0	0.49	0.51	0	1.8	1
M	69	68	1	Forearm	270	1275	0	0	0	0	0	0	0	0	0.24	0.76	0	4.06	1
F	65	95	0	Forearm	260	1277	0	0	0	0	0	0	0	0	0.51	0.49	1	1.59	0
F	62	109	1	Forearm	280	1283	0	0	0	0	0	0	0	0	0.26	0.74	0	1.65	1
F	57	23	1	Forearm	270	1287	0	0	0	0	0	0	0	0	0.34	0.66	0	2.23	1
F	56	110	1	Forearm	270	1296	0	0	0	0	0	0	0	0	0.24	0.76	0	1.83	1
F	57	170	0	Forearm	270	1306	0	0	0	0	0	0	0	0	0.39	0.61	0	2.08	1
F	57	168	0	Forearm	270	1306	0	0	0	0	0	0	0	0	0.48	0.52	0	1.89	1
M	57	160	0	Forearm	280	1313	0	0	0	0	0	0	0	0	0.34	0.66	0	1.4	0
M	80	110	0	Forearm	230	1316	0	0	0	0	0	0	0	0	0.21	0.79	0	1.07	0
F	67	34	1	Forearm	260	1320	0	0	0	0	0	0	0	0	0.59	0.41	1	2.09	1
F	57	175	0	Forearm	260	1333	0	0	0	0	0	0	0	0	0.39	0.61	0	1.99	1
F	67	74	0	Forearm	250	1333	0	0	0	0	0	0	0	0	0.37	0.63	0	2.11	1
F	57	178	0	Forearm	280	1335	0	0	0	0	0	0	0	0	0.49	0.51	0	1.59	0
M	61	184	0	Forearm	300	1343	0	0	0	0	0	0	0	0	0.23	0.77	0	1.43	0
M	59	22	0	Forearm	230	1347	0	0	0	0	0	1	1	1	0.33	0.67	0	1.48	0
F	51	55	1	Forearm	270	1351	0	0	0	0	0	0	0	0	0.29	0.71	0	1.44	0
F	39	82	0	Forearm	270	1351	0	0	0	0	0	0	0	0	0.26	0.74	0	2.1	1
F	57	162	0	Forearm	270	1351	0	0	0	0	0	0	0	0	0.49	0.51	0	4.2	1
M	60	10	1	Forearm	260	1353	0	0	0	0	0	0	0	0	0.69	0.31	1	1.56	0
F	55	194	0	Forearm	280	1368	0	0	0	0	0	0	0	0	0.29	0.71	0	2.36	1
F	39	68	0	Forearm	270	1384	0	0	0	0	0	0	0	0	0.38	0.62	0	2.13	1
M	58	59	1	Upper	270	1384	0	0	0	0	0	0	0	0	0.55	0.45	1	1.39	0
M	67	3	0	Forearm	260	1397	0	0	0	0	0	0	0	0	0.36	0.64	0	1.31	0
M	58	65	1	Upper	260	1397	0	0	0	0	0	0	0	0	0.65	0.35	1	1.33	0
F	58	120	0	Forearm	270	1405	0	0	0	0	0	0	0	0	0.27	0.73	0	1.71	1
F	61	50	1	Forearm	270	1405	0	0	0	0	0	0	0	0	0.31	0.69	0	1.48	0
F	62	56	0	Forearm	270	1405	0	0	0	0	0	0	0	0	0.66	0.34	1	2.05	1
M	59	16	0	Forearm	270	1417	0	0	0	0	0	0	0	0	0.26	0.74	0	0.54	0
F	67	77	0	Forearm	260	1420	0	0	0	0	0	0	0	0	0.34	0.66	0	2	1
F	55	207	0	Forearm	300	1430	0	0	0	0	0	0	0	0	0.37	0.63	0	2.55	1
F	56	126	1	Forearm	270	1439	0	0	0	0	0	0	0	0	0.24	0.76	0	2	1
M	67	21	1	Forearm	270	1439	0	0	0	0	0	0	0	0	0.35	0.65	0	4.92	1
M	58	62	1	Upper	270	1439	0	0	0	0	0	0	0	0	0.71	0.29	1	1.28	0
M	63	52	1	Forearm	260	1449	0	0	0	0	0	0	0	0	0.16	0.84	0	1.33	0
F	63	127	0	Forearm	270	1450	0	0	0	0	0	0	0	0	0.24	0.76	0	2.21	1
M	58	68	1	Upper	260	1454	0	0	0	0	0	0	0	0	0.82	0.18	1	1.36	0
M	64	122	1	Forearm	300	1466	0	0	0	0	0	0	0	0	0.16	0.84	0	2	1
F	55	201	0	Forearm	300	1466	0	0	0	0	0	0	0	0	0.27	0.73	0	4.33	1
M	46	104	1	Forearm	300	1466	0	0	0	0	0	0	0	0	0.33	0.67	0	0.98	0
M	55	3	1	Forearm	270	1474	0	0	0	0	0	0	0	0	0.43	0.57	0	1.26	0
F	71	26	1	Upper	270	1474	0	0	0	0	0	0	0	0	0.37	0.63	0	1.43	0
F	62	96	1	Forearm	270	1484	0	0	0	0	0	0	0	0	0.25	0.75	0	1.69	1
M	61	181	0	Forearm	300	1485	0	0	0	0	0	0	0	0	0.19	0.81	0	3	1
F	57	132	1	Upper	230	1487	0	0	0	0	0	0	0	0	0.6	0.4	1	1.87	1
F	57	169	0	Forearm	260	1488	0	0	0	0	0	0	0	0	0.67	0.33	1	1.89	1
M	52	8	0	Upper	260	1488	0	0	0	0	0	0	0	0	0.3	0.7	0	1.54	0
M	80	114	0	Forearm	280	1493	0	0	0	0	0	0	0	0	0.29	0.71	0	1.34	0
F	62	69	0	Upper	280	1493	0	0	0	0	0	0	0	0	0.65	0.35	1	1.99	1
F	39	75	0	Forearm	250	1498	0	0	0	0	0	0	0	0	0.61	0.39	1	2.18	1
F	57	173	0	Forearm	300	1502	0	0	0	0	0	0	0	0	0.43	0.57	0	1.99	1
M	59	3	0	Forearm	280	1504	0	0	0	0	0	0	0	0	0.22	0.78	0	1.25	0
M	63	60	1	Forearm	270	1505	0	0	0	0	0	1	1	1	0.45	0.55	0	1.32	0
F	51	72	1	Forearm	270	1510	0	0	0	0	0	0	0	0	0.18	0.82	0	1.6	1
F	39	62	0	Forearm	270	1510	0	0	0	0	0	0	0	0	0.22	0.78	0	2.03	1
M	58	73	1	Upper	270	1510	0	0	0	0	0	0	0	0	0.79	0.21	1	1.35	0
F	66	15	0	Forearm	260	1521	0	0	0	0	0	0	0	0	0.3	0.7	0	1.76	1
F	58	118	0	Forearm	260	1521	0	0	0	0	0	0	0	0	0.52	0.48	1	1.71	1
F	44	96	1	Forearm	250	1533	0	0	0	0	0	0	0	0	0.36	0.64	0	1.84	1
M	59	117	1	Forearm	300	1538	0	0	0	0	0	0	0	0	0.22	0.78	0	1.57	0
M	67	38	1	Forearm	250	1540	0	0	0	0	0	0	0	0	0.35	0.65	0	1.29	0
F	56	117	1	Forearm	270	1542	0	0	0	0	0	0	0	0	0.18	0.82	0	1.83	1
F	71	297	0	Forearm	270	1542	0	0	0	0	0	0	0	0	0.26	0.74	0	2.7	1
F	57	68	1	Forearm	230	1558	0	0	0	0	0	0	0	0	0.2	0.8	0	1.35	0
F	58	110	0	Forearm	280	1561	0	0	0	0	0	0	0	0	0.4	0.6	0	1.76	1
M	22	5	1	Forearm	250	1567	0	0	0	0	0	0	0	0	0.2	0.8	0	1.77	1
M	61	193	0	Forearm	300	1574	0	0	0	0	0	0	0	0	0.26	0.74	0	1.48	0
M	59	19	0	Forearm	270	1580	0	0	0	0	0	0	0	0	0.2	0.8	0	1.45	0
F	67	66	0	Forearm	270	1580	0	0	0	0	0	0	0	0	0.39	0.61	0	1.98	1
M	57	154	0	Forearm	270	1581	0	0	0	0	0	0	0	0	0.21	0.79	0	1.22	0
F	63	120	0	Forearm	270	1581	0	0	0	0	0	0	0	0	0.25	0.75	0	2.11	1
M	55	0	1	Forearm	230	1595	0	0	0	0	0	0	0	0	0.35	0.65	0
F	51	56	1	Forearm	260	1595	0	0	0	0	0	0	0	0	0.27	0.73	0	1.46	0
F	46	45	0	Forearm	260	1595	0	0	0	0	0	0	0	0	0.53	0.47	1	2.1	1
M	52	11	0	Upper	260	1595	0	0	0	0	0	0	0	0	0.36	0.64	0	3.61	1
M	72	46	1	Forearm	250	1616	0	0	0	0	0	0	0	0	0.42	0.58	0	1.51	0
F	63	136	0	Forearm	270	1618	0	0	0	0	0	0	0	0	0.44	0.56	0	2.17	1
F	71	294	0	Forearm	270	1623	0	0	0	0	0	0	0	0	0.33	0.67	0	2.37	1
F	65	92	0	Forearm	260	1630	0	0	0	0	0	0	0	0	0.21	0.79	0	1.46	0
F	57	174	0	Forearm	260	1632	0	0	0	0	0	0	0	0	0.45	0.55	0	1.99	1
F	55	204	0	Forearm	300	1638	0	0	0	0	0	0	0	0	0.37	0.63	0	2.5	1
F	62	115	1	Forearm	280	1638	0	0	0	0	0	0	0	0	0.2	0.8	0	1.74	1
M	46	57	0	Forearm	280	1640	0	0	0	0	0	0	0	0	0.23	0.77	0	1.38	0
F	78	4	0	Forearm	260	1641	0	0	0	0	0	0	0	0	0.22	0.78	0	1.6	1
F	44	99	1	Forearm	270	1656	0	0	0	0	0	0	0	0	0.4	0.6	0	1.62	1
F	71	300	0	Forearm	270	1663	0	0	0	0	0	0	0	0	0.31	0.69	0	2	1
F	62	23	0	Forearm	260	1670	0	0	0	0	0	0	0	0	0.27	0.73	0	2.88	1
F	62	106	1	Forearm	280	1677	0	0	0	0	0	0	0	0	0.2	0.8	0	1.65	1
M	80	106	0	Forearm	260	1681	0	0	0	0	0	0	0	0	0.19	0.81	0	1.27	0
F	68	13	1	Upper	260	1681	0	0	0	0	0	0	0	0	0.43	0.57	0	1.5	0
M	58	17	1	Forearm	250	1694	0	0	0	0	0	0	0	0	0.31	0.69	0	1.61	1
F	62	20	0	Forearm	270	1695	0	0	0	0	0	0	0	0	0.27	0.73	0	1.69	1
M	72	52	1	Forearm	240	1702	0	0	0	0	0	0	0	0	0.41	0.59	0	1	0
F	62	100	1	Forearm	270	1704	0	0	0	0	0	0	0	0	0.24	0.76	0	1.72	1
M	77	39	0	Forearm	250	1716	0	0	0	0	0	0	0	0	0.28	0.72	0	1.14	0
F	58	122	0	Forearm	260	1721	0	0	0	0	0	0	0	0	0.3	0.7	0	1.64	1
F	63	133	0	Forearm	270	1734	0	0	0	0	0	0	0	0	0.27	0.73	0	3.74	1
F	55	98	1	Forearm	270	1734	0	0	0	0	0	0	0	0	0.34	0.66	0	1.91	1
M	57	143	0	Forearm	270	1734	0	0	0	0	0	0	0	0	0.18	0.82	0	1.37	0
F	57	61	1	Forearm	230	1735	0	0	0	0	0	0	0	0	0.4	0.6	0	1.22	0
F	58	123	0	Forearm	260	1761	0	0	0	0	0	0	0	0	0.39	0.61	0	1.64	1
M	70	19	0	Upper	280	1767	0	0	0	0	0	0	0	0	0.35	0.65	0	2.03	1
M	46	93	1	Forearm	250	1773	0	0	0	0	0	0	0	0	0.38	0.62	0	1.03	0
F	54	32	0	Upper	250	1800	0	0	0	0	0	0	0	0	1	0	1	1.07	0
M	61	197	0	Forearm	300	1840	0	0	0	0	0	0	0	0	0.16	0.84	0	1.49	0
F	63	202	0	Upper	240	1853	0	0	0	0	0	0	0	0	0.33	0.67	0	1.63	1
F	62	17	0	Forearm	270	1872	0	0	0	0	0	0	0	0	0.25	0.75	0	1.65	1
M	58	26	1	Forearm	260	1872	0	0	0	0	0	0	0	0	0.27	0.73	0	1.47	0
F	44	90	1	Forearm	260	1872	0	0	0	0	0	0	0	0	0.13	0.87	0	1.74	1
M	52	15	0	Upper	270	1872	0	0	0	0	0	0	0	0	0.38	0.62	0	1.42	0
M	58	23	1	Forearm	250	1886	0	0	0	0	0	0	0	0	0.19	0.81	0	1.53	0
F	71	290	0	Forearm	270	1890	0	0	0	0	0	0	0	0	0.3	0.7	0	2.4	1
M	40	44	1	Upper	280	1897	0	0	0	0	0	0	0	0	0.39	0.61	0	1.27	0
M	58	20	1	Forearm	270	1898	0	0	0	0	0	0	0	0	0.25	0.75	0	1.46	0
F	67	87	0	Forearm	270	1898	0	0	0	0	0	0	0	0	0.29	0.71	0	1.32	0
F	62	76	0	Forearm	270	1898	0	0	0	0	0	0	0	0	0.53	0.47	1	2	1
F	44	99	1	Forearm	270	1915	0	0	0	0	0	1	0	1	0.4	0.6	0	1.62	1
F	56	123	1	Forearm	270	1944	0	0	0	0	0	0	0	0	0.17	0.83	0	2.19	1
F	66	24	0	Forearm	270	1944	0	0	0	0	0	0	0	0	0.39	0.61	0	1.78	1
M	57	147	0	Forearm	270	2003	0	0	0	0	0	0	0	0	0.3	0.7	0	1.29	0
M	40	34	1	Upper	250	2019	0	0	0	0	0	0	0	0	0.43	0.57	0	1.28	0
F	66	21	0	Forearm	260	2057	0	0	0	0	0	0	0	0	0.28	0.72	0	1.56	0
F	54	29	0	Upper	250	2064	0	0	0	0	0	0	0	0	0.62	0.38	1	1.8	1
M	58	10	1	Forearm	270	2086	0	0	0	0	0	0	0	0	0.22	0.78	0	1.48	0
M	58	29	1	Forearm	260	2156	0	0	0	0	0	0	0	0	0.22	0.78	0	1.54	0
F	67	87	0	Forearm	260	2156	0	0	0	0	0	0	0	0	0.29	0.71	0	1.32	0
M	75	55	0	Forearm	280	2161	0	0	0	0	0	0	0	0	0.62	0.38	1	1.46	0
F	62	14	0	Forearm	270	2187	0	0	0	0	0	0	0	0	0.34	0.66	0	1.67	1
F	64	46	1	Forearm	270	2187	0	0	0	0	0	0	0	0	0.19	0.81	0	1.64	1
F	62	29	0	Forearm	270	2187	0	0	0	0	0	0	0	0	0.23	0.77	0	1.43	0
F	65	101	0	Forearm	270	2187	0	0	0	0	0	0	0	0	0.3	0.7	0	1.7	1
M	63	63	1	Forearm	270	2187	0	0	0	0	0	0	0	0	0.32	0.68	0	1.5	0
F	54	15	0	Upper	270	2239	0	0	0	0	0	0	0	0	0.67	0.33	1	1.45	0
M	46	91	1	Forearm	250	2253	0	0	0	0	0	0	0	0	0.2	0.8	0	1.09	0
F	63	208	0	Upper	260	2257	0	0	0	0	0	0	0	0	0.36	0.64	0	1.66	1
F	48	103	0	Forearm	280	2268	0	0	0	0	0	0	0	0	0.17	0.83	0	1.81	1
F	66	27	0	Forearm	260	2288	0	0	0	0	0	0	0	0	0.33	0.67	0	1.59	0
F	66	18	0	Forearm	260	2288	0	0	0	0	0	0	0	0	0.37	0.63	0	1.87	1
M	67	32	1	Forearm	250	2306	0	0	0	0	0	0	0	0	0.32	0.68	0	1.4	0
M	67	27	1	Forearm	270	2320	0	0	0	0	0	0	0	0	0.34	0.66	0	1.26	0
F	58	128	0	Forearm	250	2360	0	0	0	0	0	0	0	0	0.34	0.66	0	1.82	1
F	65	98	0	Forearm	280	2376	0	0	0	0	0	0	0	0	0.35	0.65	0	1.58	0
F	67	71	0	Forearm	270	2376	0	0	0	0	0	0	0	0	0.34	0.66	0	1.95	1
M	59	12	0	Forearm	280	2430	0	0	0	0	0	1	1	1	0.51	0.49	1	1.67	1
F	62	112	1	Forearm	270	2433	0	0	0	0	0	0	0	0	0.28	0.72	0	1.8	1
F	57	180	0	Forearm	270	2549	0	0	0	0	0	0	0	0	0.52	0.48	1	1.87	1
F	65	85	0	Forearm	270	2549	0	0	0	0	0	0	0	0	0.31	0.69	0	1.71	1
F	63	198	0	Upper	270	2549	0	0	0	0	0	0	0	0	0.33	0.67	0	1.58	0
F	66	8	0	Forearm	270	2557	0	0	0	0	0	0	0	0	0.61	0.39	1	1.81	1
M	59	111	1	Forearm	280	2583	0	0	0	0	0	0	0	0	0.23	0.77	0	1.48	0
M	64	59	1	Forearm	270	2608	0	0	0	0	0	0	0	0	0.3	0.7	0	1.51	0
M	59	13	0	Forearm	270	2608	0	0	0	0	0	0	0	0	0.3	0.7	0	1.67	1
M	56	89	0	Upper	270	2608	0	0	0	0	0	0	0	0	0.37	0.63	0	1.12	0
M	75	70	0	Forearm	270	2789	0	0	0	0	0	0	0	0	0.58	0.42	1	1.43	0
M	64	50	1	Forearm	270	2815	0	0	0	0	0	0	0	0	0.27	0.73	0	1.21	0
M	64	40	1	Forearm	260	2839	0	0	0	0	0	0	0	0	0.3	0.7	0	1.35	0
F	54	27	0	Upper	260	2839	0	0	0	0	0	0	0	0	0.7	0.3	1	1.88	1
M	31	27	1	Forearm	270	2876	0	0	0	0	0	0	0	0	0.2	0.8	0	1.61	1
M	75	61	0	Forearm	270	2948	0	0	0	0	0	0	0	0	0.6	0.4	1	1.43	0
F	51	51	1	Forearm	270	2948	0	0	0	0	0	0	0	0	0.31	0.69	0	1.52	0
M	52	5	0	Upper	270	2948	0	0	0	0	0	0	0	0	0.29	0.71	0	1.4	0
M	59	20	0	Upper	260	2971	0	0	0	0	0	1	0	1	0.42	0.58	0	1.43	0
M	75	51	0	Forearm	270	3085	0	0	0	0	0	0	0	0	0.6	0.4	1	1.41	0
M	56	82	0	Upper	270	3085	0	0	0	0	0	0	0	0	0.67	0.33	1	1.18	0
